# Supplementary material
Source: Elsevier journal article supplement (https://www.sciencedirect.com/science/article/pii/S0300893214002024)
Supplement: mmc1 [file mmc1.pdf]

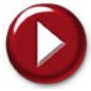

**Material suplementario**

---

Análisis combinado de dos ensayos aleatorizados de comparación de *stents* con recubrimiento de titanio-óxido nítrico con *stents* liberadores de fármacos en el infarto de miocardio con elevación del ST

Petri O. Tuomainen <sup>a,b</sup>, Jussi Sia <sup>c</sup>, Wail Nammas <sup>b</sup>, Matti Niemelä <sup>d</sup>,  
Juhani K.E. Airaksinen <sup>e</sup>, Fausto Biancari <sup>f</sup> y Pasi P. Karjalainen <sup>b,\*</sup>

<sup>a</sup>*Department of Internal Medicine and Heart Center, Kuopio University Hospital, University of Eastern Finland, Kuopio, Finlandia*

<sup>b</sup>*Department of Cardiology, Satakunta Central Hospital, Pori, Finlandia*

<sup>c</sup>*Department of Cardiology, Kokkola Central Hospital, Kokkola, Finlandia*

<sup>d</sup>*Department of Internal Medicine, Division of Cardiology, University of Oulu, Oulu, Finlandia*

<sup>e</sup>*Department of Medicine, Turku University Hospital, Turku, Finlandia*

<sup>f</sup>*Division of Cardiothoracic and Vascular Surgery, Department of Surgery, Oulu, Finlandia*

---

**Table 1**

Baseline Clinical Characteristics of the Two Study Groups in the TITAX-AMI Trial

| Variable              | BAS group<br>N=83 | DES group<br>N=97 | P Value |
|-----------------------|-------------------|-------------------|---------|
| Age, mean (SD), y     | 63.3 (10.5)       | 62.0 (11.8)       | .43     |
| Male gender           | 60 (72.3)         | 77 (79.4)         | .27     |
| Family history of CAD | 36 (43.4)         | 47 (48.5)         | .50     |
| Diabetes mellitus     | 12 (14.5)         | 9 (9.3)           | .28     |
| Hypertension          | 41 (49.4)         | 45 (46.4)         | .69     |
| Hypercholesterolemia  | 47 (56.6)         | 68 (70.1)         | .06     |
| Current smoking       | 27 (32.5)         | 43 (44.3)         | .11     |
| Prior MI              | 10 (12.0)         | 6 (6.2)           | .17     |
| Prior PCI             | 4 (4.8)           | 4 (4.1)           | .82     |
| Prior CABG            | 4 (4.8)           | 0 (0)             | .03     |
| Prior stroke          | 1 (1.2)           | 4 (4.1)           | .23     |

BAS, bioactive stent; DES, drug-eluting stent; CABG, coronary artery bypass grafting; CAD indicates coronary artery disease; MI, myocardial infarction; PCI, percutaneous coronary intervention; SD, standard deviation.

Continuous variables are presented as mean (standard deviation), while categorical variables are presented as frequency (percentage).

**Table 2**

Baseline Clinical Characteristics of the Two Study Groups in the BASE-ACS Trial

| Variable              | BAS group<br>N=162 | DES group<br>N=159 | P Value |
|-----------------------|--------------------|--------------------|---------|
| Age, mean (SD), y     | 61.9 (12.0)        | 61.5 (12.5)        | .79     |
| Male gender           | 128 (79.0)         | 121 (76.1)         | .53     |
| Family history of CAD | 75 (46.3)          | 60 (37.7)          | .12     |
| Diabetes mellitus     | 23 (14.2)          | 24 (15.1)          | .82     |
| Hypertension          | 54 (33.3)          | 61 (38.4)          | .35     |
| Hypercholesterolemia  | 50 (30.9)          | 55 (34.6)          | .48     |
| Current smoking       | 73 (45.1)          | 66 (41.5)          | .52     |
| Prior MI              | 13 (8.0)           | 8 (5.0)            | .28     |
| Prior PCI             | 5 (3.1)            | 12 (7.5)           | .07     |
| Prior CABG            | 5 (3.1)            | 2 (1.3)            | .26     |
| Prior stroke          | 5 (3.1)            | 2 (1.3)            | .26     |

BAS, bioactive stent; DES, drug-eluting stent; CABG, coronary artery bypass grafting; CAD, coronary artery disease; MI, myocardial infarction; PCI, percutaneous coronary intervention; SD, standard deviation.

Continuous variables are presented as mean (SD), while categorical variables are presented as frequency (percentage).

**Table 3**

Angiographic and Procedural Data of the Two Study Groups in the TITAX-AMI Trial

| Variable                                              | BAS group<br>N=83 | DES group<br>N=97 | P Value |
|-------------------------------------------------------|-------------------|-------------------|---------|
| <i>Vessel type</i>                                    |                   |                   |         |
| Left anterior descending artery                       | 49 (59.0)         | 39 (40.2)         | .01     |
| Left circumflex artery                                | 4 (4.8)           | 21 (21.6)         | .001    |
| Right coronary artery                                 | 28 (33.7)         | 36 (37.1)         | .64     |
| Left main coronary artery                             | 0 (0)             | 1 (1.0)           | .35     |
| Saphenous venous graft                                | 2 (2.4)           | 0 (0)             | .12     |
| <i>Thrombus</i>                                       | 56 (67.5)         | 38 (39.2)         | <.001   |
| <i>Reference vessel diameter, mean (SD), mm</i>       | 3.26 (0.44)       | 3.20 (0.47)       | .52     |
| <i>Lesion length, mean (SD) mm</i>                    | 14.3 (5.5)        | 12.5 (5.3)        | .01     |
| <i>Stent diameter, mean (SD), mm</i>                  | 3.38 (1.15)       | 3.17 (0.44)       | .10     |
| <i>Stent length, mean (SD), mm</i>                    | 18.1 (4.5)        | 17.4 (4.9)        | .23     |
| <i>Total stent length, mean (SD), mm</i>              | 19.3 (6.5)        | 17.9 (6.0)        | .14     |
| <i>Number of stents per culprit lesion, mean (SD)</i> | 1.11 (0.31)       | 1.06 (0.28)       | .30     |
| <i>Thrombus aspiration</i>                            | 0 (0)             | 0 (0)             | NA      |
| <i>Direct stenting</i>                                | 11 (13.3)         | 18 (18.6)         | .33     |
| <i>Post-dilatation</i>                                | 40 (48.2)         | 38 (39.2)         | .22     |
| <i>Medications</i>                                    |                   |                   |         |
| Low-molecular weight heparin                          | 81 (97.6)         | 92 (94.8)         | .34     |
| Unfractionated heparin                                | 1 (1.2)           | 1 (1.0)           | .91     |
| Glycoprotein IIb/IIIa inhibitor                       | 55 (66.3)         | 56 (57.7)         | .24     |
| Bivalirudin                                           | 1 (1.2)           | 2 (2.1)           | .65     |

BAS, bioactive stent; DES, drug-eluting stent; NA, not available; SD, standard deviation.

Continuous variables are presented as mean (standard deviation), while categorical variables are presented as frequency (percentage).

**Table 4**

Angiographic and Procedural Data of the Two Study Groups in the BASE-ACS Trial

| Variable                                              | BAS group<br>N=162 | DES group<br>N=159 | P Value |
|-------------------------------------------------------|--------------------|--------------------|---------|
| <i>Vessel type</i>                                    |                    |                    |         |
| Left anterior descending artery                       | 66 (40.7)          | 79 (49.7)          | .11     |
| Left circumflex artery                                | 27 (16.7)          | 30 (18.9)          | .61     |
| Right coronary artery                                 | 68 (42.0)          | 50 (31.4)          | .05     |
| Left main coronary artery                             | 0 (0)              | 0 (0)              | NA      |
| Saphenous venous graft                                | 1 (0.6)            | 0 (0)              | .32     |
| <i>Thrombus</i>                                       | 125 (77.2)         | 114 (71.7)         | .26     |
| <i>Reference vessel diameter, mean (SD), mm</i>       | 3.11 (0.40)        | 3.13 (0.41)        | .57     |
| <i>Lesion length, mean (SD), mm</i>                   | 14.7 (5.0)         | 15.0 (7.4)         | .72     |
| <i>Stent diameter, mean (SD), mm</i>                  | 3.13 (0.40)        | 3.14 (0.41)        | .89     |
| <i>Stent length, mean (SD), mm</i>                    | 18.5 (5.0)         | 18.7 (5.4)         | .72     |
| <i>Total stent length, mean (SD), mm</i>              | 22.2 (10.2)        | 20.4 (7.6)         | .14     |
| <i>Number of stents per culprit lesion, mean (SD)</i> | 1.17 (0.41)        | 1.13 (0.33)        | .44     |
| <i>Thrombus aspiration</i>                            | 71 (43.8)          | 66 (41.5)          | .67     |
| <i>Direct stenting</i>                                | 73 (45.1)          | 67 (42.1)          | .60     |
| <i>Post-dilatation</i>                                | 65 (40.1)          | 70 (44.0)          | .48     |
| <i>Medications</i>                                    |                    |                    |         |
| Low-molecular weight heparin                          | 68 (42.0)          | 62 (39.0)          | .59     |
| Unfractionated heparin                                | 39 (24.1)          | 50 (31.4)          | .14     |
| Glycoprotein IIb/IIIa inhibitor                       | 64 (39.5)          | 67 (42.1)          | .63     |
| Bivalirudin                                           | 54 (33.3)          | 46 (28.9)          | .39     |

BAS, bioactive stent; DES, drug-eluting stent; NA, not available; SD, standard deviation.

Continuous variables are presented as mean (standard deviation), while categorical variables are presented as frequency (percentage).
